- ficial NK1-expressing neurons control spinal excitability through activation of descending pathways. *Nat Neurosci* 2002; 5:1319-26
42. Zeitz KP, Guy N, Malmberg AB, Dirajlal S, Martin WJ, Sun L, Bonhaus DW, Stucky CL, Julius D, Basbaum AI: The 5-HT3 subtype of serotonin receptor contributes to nociceptive processing *via* a novel subset of myelinated and unmyelinated nociceptors. *J Neurosci* 2002; 22:1010-9
  43. Chen Y, Oatway MA, Weaver LC: Blockade of the 5-HT3 receptor for days causes sustained relief from mechanical allodynia following spinal cord injury. *J Neurosci Res* 2009; 87:418-24
  44. Oatway MA, Chen Y, Weaver LC: The 5-HT3 receptor facilitates at-level mechanical allodynia following spinal cord injury. *Pain* 2004; 110:259-68
  45. Sasaki M, Ishizaki K, Obata H, Goto F: Effects of 5-HT2 and 5-HT3 receptors on the modulation of nociceptive transmission in rat spinal cord according to the formalin test. *Eur J Pharmacol* 2001; 424:45-52
  46. Machu TK: Therapeutics of 5-HT3 receptor antagonists: Current uses and future directions. *Pharmacol Ther* 2011; 130:338-47
  47. Simpson KH, Murphy P, Colthup PV, Whelan P: Concentration of ondansetron in cerebrospinal fluid following oral dosing in volunteers. *Psychopharmacology (Berl)* 1992; 109:497-8
  48. Hayashida K, DeGoes S, Curry R, Eisenach JC: Gabapentin activates spinal noradrenergic activity in rats and humans and reduces hypersensitivity after surgery. *ANESTHESIOLOGY* 2007; 106:557-62

## ANESTHESIOLOGY REFLECTIONS FROM THE WOOD LIBRARY-MUSEUM

### Edison's Polyform

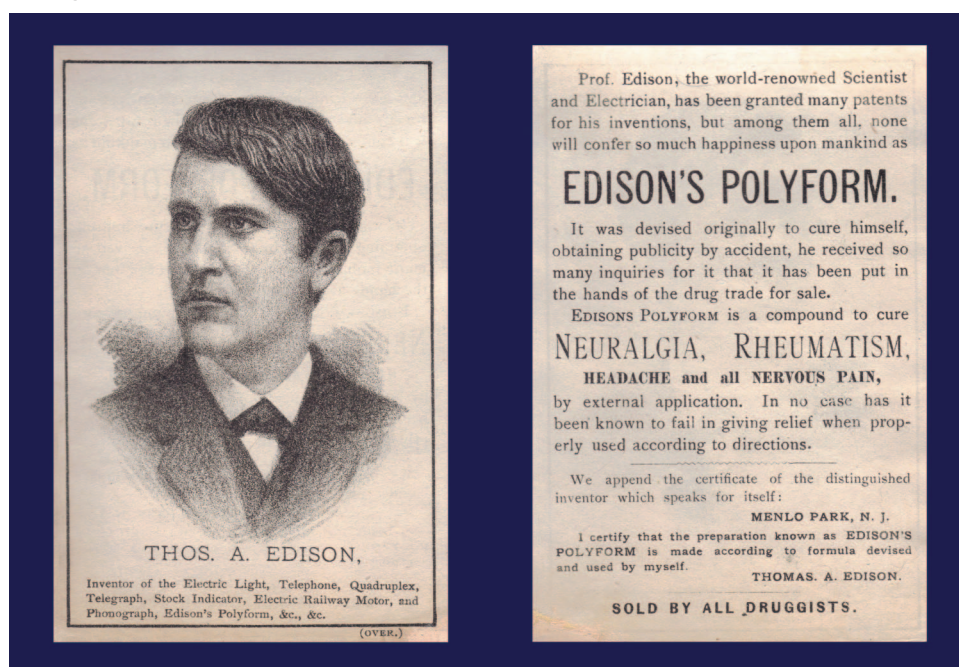

In 1879 in New York, the Menlo Park Manufacturing Company was incorporated to market Polyform, a topical analgesic formulated by young Thomas Alva Edison (1847–1931) (*left*). Though “devised originally to cure himself,” Polyform was released to the public by Edison as a “compound to cure neuralgia, rheumatism, headache and all nervous pain, by external application.” Within 5 years, the company moved to Boston and eventually reorganized. Of all of Edison’s inventions, “none will confer so much happiness upon mankind” as Polyform — or so the reorganized company promised (*right*). The public did not buy the promise . . . or the product, and Edison himself finally blocked further advertising. (Copyright © the American Society of Anesthesiologists, Inc.)

George S. Bause, M.D., M.P.H., Honorary Curator, ASA’s Wood Library-Museum of Anesthesiology, Park Ridge, Illinois, and Clinical Associate Professor, Case Western Reserve University, Cleveland, Ohio. UJYC@aol.com.
